# Supplementary material for: Stabilization of MIV = Ti, Zr, Hf, Ce, and Th using a selenium bis(phenolate) ligand
Source: Royal Society of Chemistry journal article supplement (doi:10.1039/c4dt01798f), 2014-09-11
Supplement: c4dt01798f1.pdf [file c4dt01798f1.pdf]

## Supporting Information

### Stabilization of M<sup>IV</sup> (M = Ti, Zr, Hf, Ce, and Th) Using a Selenium Bis(Phenolate) Ligand

Andrew C. Behrle,<sup>1</sup> Jessica R. Levin,<sup>2</sup> Jee Eon Kim,<sup>2</sup> Jonathan M. Drewett,<sup>1</sup> Charles L. Barnes,<sup>1</sup>  
Eric J. Schelter,<sup>2</sup> and Justin R. Walensky<sup>1\*</sup>

<sup>1</sup> Department of Chemistry, University of Missouri-Columbia, 601 S. College Avenue,  
Columbia, MO 65211-7600, USA

<sup>2</sup> P. Roy and Diana T. Vagelos Laboratories, Department of Chemistry, University of  
Pennsylvania, Philadelphia, Pennsylvania 19104, USA

## Table of Contents

|                                                                                                         |    |
|---------------------------------------------------------------------------------------------------------|----|
| Synthesis of Na <sub>2</sub> <sup>Ar</sup> OSeO.....                                                    | S2 |
| Synthesis of {Ce[ <sup>Ar</sup> OSeO] <sub>2</sub> } <sub>2</sub> {Na(THF) <sub>3</sub> }.....          | S2 |
| Figure S1. Cyclic voltammogram of Ti( <sup>Ar</sup> OSeO) <sub>2</sub> , 2.....                         | S3 |
| Figure S2. Linear plot of scan rate vs. peak currents for Ti( <sup>Ar</sup> OSeO) <sub>2</sub> , 2..... | S3 |
| Figure S3. Cyclic voltammogram of Th[ <sup>Ar</sup> OSeO] <sub>2</sub> (THF) <sub>2</sub> , 5.....      | S4 |
| Figure S4. Cyclic voltammogram of Ce( <sup>Ar</sup> OSeO) <sub>2</sub> (THF) <sub>2</sub> , 6.....      | S4 |
| Figure S5. Cyclic voltammogram of [Ce( <sup>Ar</sup> OSeO) <sub>2</sub> ][Na(THF) <sub>3</sub> ].....   | S5 |
| Figure S6. <sup>1</sup> H NMR spectrum of Hf[ <sup>Ar</sup> OSeO] <sub>2</sub> (THF).....               | S6 |
| Table S1. Electrochemical Data for 6.....                                                               | S7 |
| Table S2. Electrochemical data for [Ce( <sup>Ar</sup> OSeO) <sub>2</sub> ][Na(THF) <sub>3</sub> ].....  | S8 |

**Na<sub>2</sub><sup>Ar</sup>OSeO**. A 20 mL scintillation vial was charged with H<sub>2</sub><sup>Ar</sup>OSeO, **1** (800 mg, 1.63 mmol) and THF (8 mL) was added. Then, NaN(SiMe<sub>3</sub>)<sub>2</sub> (659 mg, 3.59 mmol) was added at room temperature and the reaction mixture was stirred for 4 h and filtered over a Celite pipette. The solution was concentrated, layered with hexanes and placed in a -23 °C freezer overnight to yield a white solid (828 mg, 95%). An NMR sample was taken in C<sub>6</sub>D<sub>6</sub> and quenched with D<sub>2</sub>O to ensure **1** was fully deprotonated.

**{Ce[<sup>Ar</sup>OSeO]<sub>2</sub>}{Na(THF)<sub>3</sub>}**. A 20 mL scintillation vial was charged with Na<sub>2</sub><sup>Ar</sup>OSeO, (200 mg, 0.375 mmol) and THF (6 mL) was added. A second 20 mL scintillation vial was charged with Ce(OTf)<sub>3</sub> (100 mg, 0.170 mmol) and THF (6 mL) was added. Both vials were placed in a -23 °C freezer for 10 minutes and the Na<sub>2</sub><sup>Ar</sup>OSeO solution was added to Ce(OTf)<sub>3</sub>. The reaction was allowed to stir for 15 h to yield a pale red colored solution. The reaction was filtered over a Celite pipette, concentrated, and layered with hexanes to yield a white precipitate (147 mg, 64%).  
<sup>1</sup>H NMR (C<sub>6</sub>D<sub>6</sub>, 25°C): δ 8.63 (s, 4H, ArH), 5.34 (s, 36H, <sup>t</sup>BuH), 4.86 (s, 4H, ArH), 2.72 (THF), 1.13 (s, 36H, <sup>t</sup>BuH), 1.00 (THF).

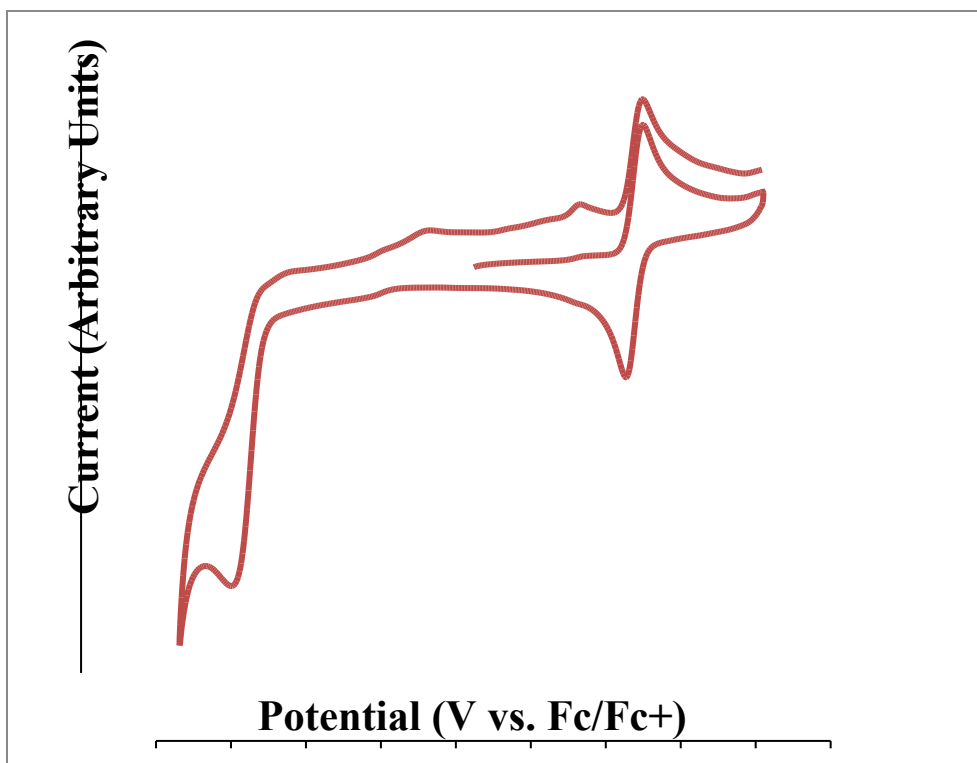

**Figure S1.** Cyclic voltammogram of  $\text{Ti}(\text{ArOSeO})_2$ , **2**, showing full scan with ligand-based oxidation at 0.99 V vs.  $\text{Fc}/\text{Fc}^+$ .

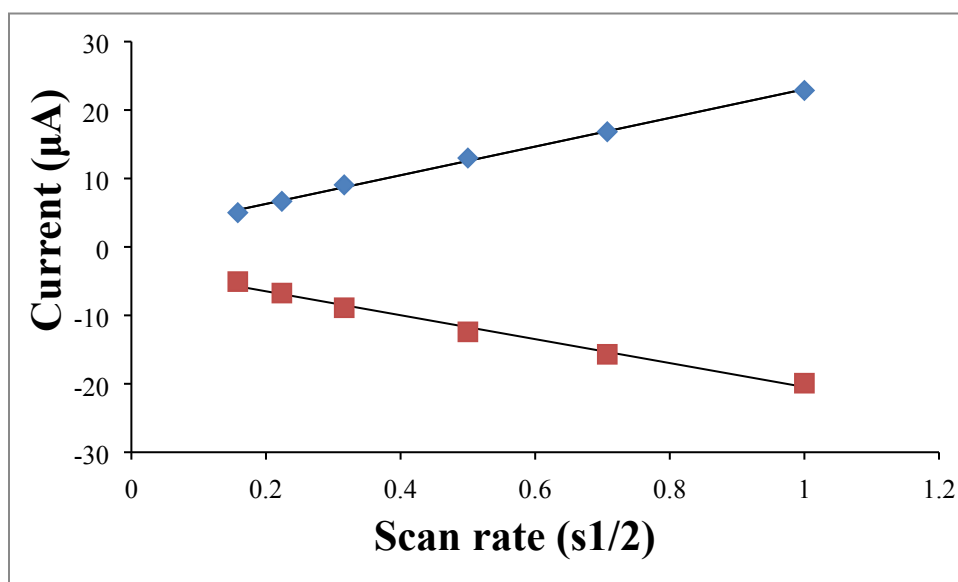

**Figure S2.** Linear plot of scan rate vs. peak currents for  $\text{Ti}(\text{ArOSeO})_2$ .

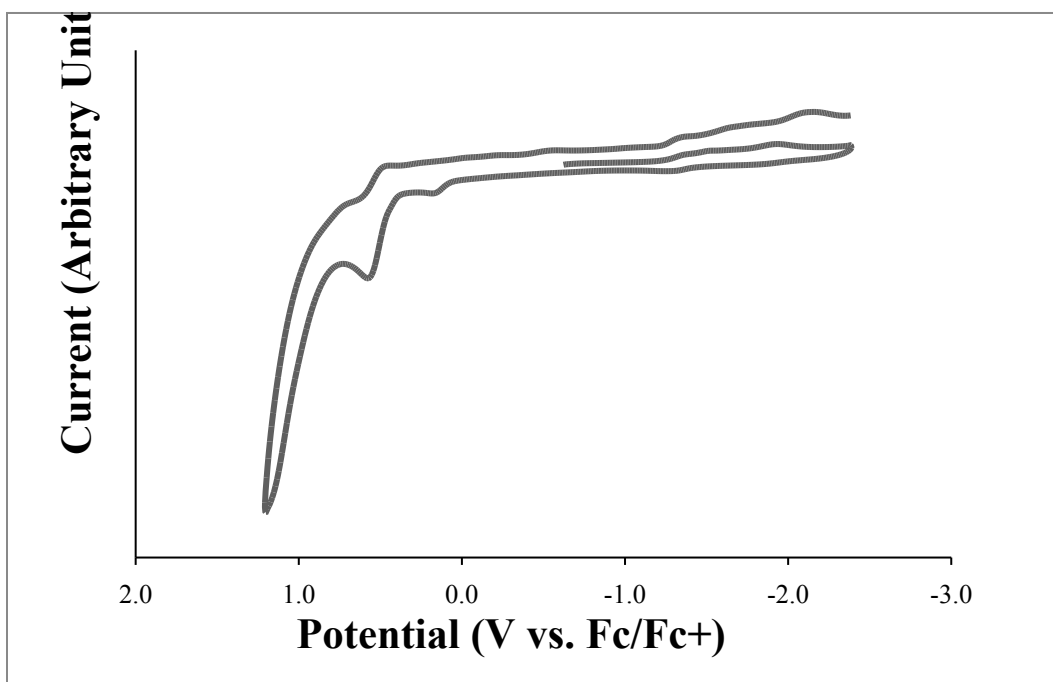

**Figure S3.** Cyclic voltammogram of  $\text{Th}[\text{ArOSeO}]_2(\text{THF})_2$ , **5**, showing full scan with ligand-based oxidations at 0.568 V and 0.178 V vs.  $\text{Fc}/\text{Fc}^+$ .

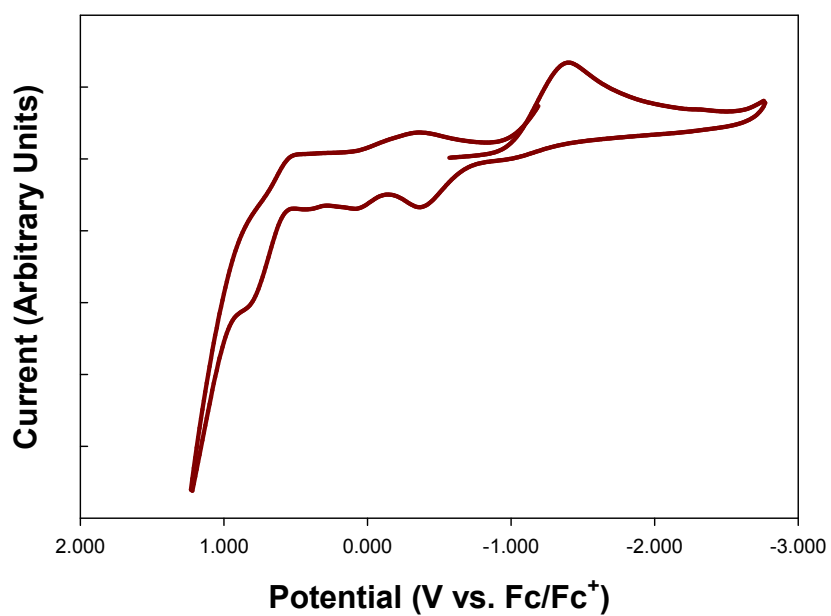

**Figure S4.** Cyclic voltammogram of  $\text{Ce}(\text{ArOSeO})_2(\text{THF})_2$ , **6**, showing full scan.

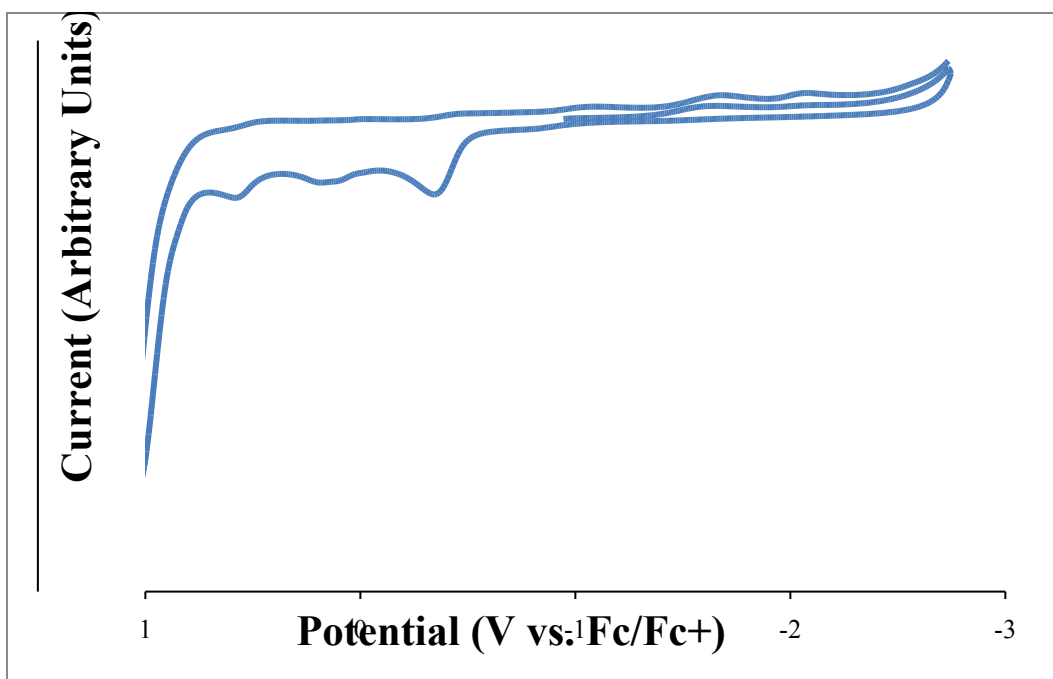

**Figure S5.** Cyclic voltammogram of  $[\text{Ce}(\text{ArOSeO})_2][\text{Na}(\text{THF})_3]$  showing full scan with ligand-based oxidations at 0.58 V vs. Fc/Fc<sup>+</sup>.

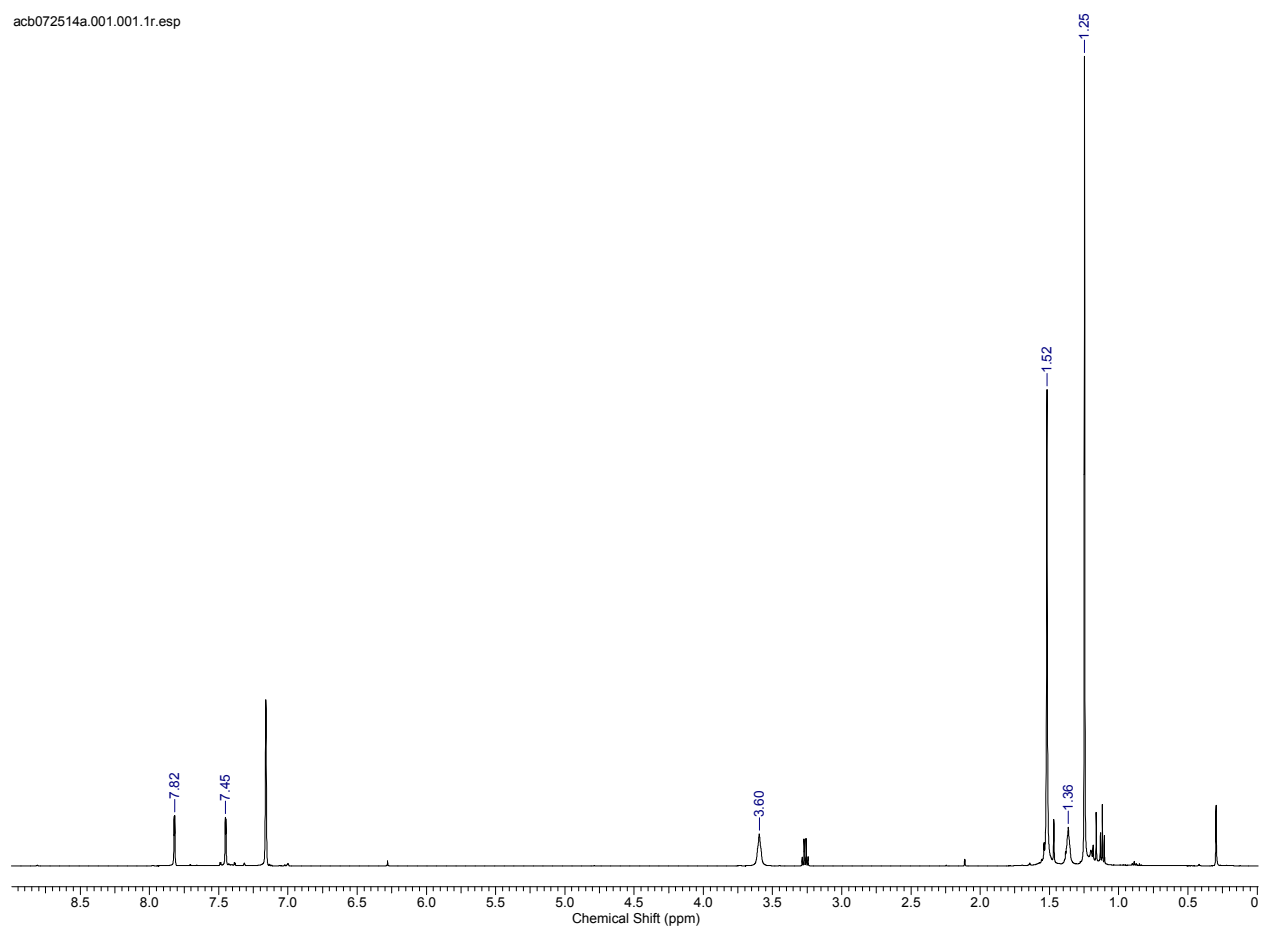

**Figure S6.** <sup>1</sup>H NMR spectrum of Hf[<sup>Ar</sup>OSeO]<sub>2</sub>(THF), **4** with product chemical resonances labelled.

**Table S1.** Electrochemical Data for **6**.

| Scan rate<br>(mV/sec) | $E_{pa}$<br>[V vs. Fc] | $E_{pc}$<br>[V vs. Fc] | $\Delta E$<br>[V] | $I_{pa}/I_{pc}$ |
|-----------------------|------------------------|------------------------|-------------------|-----------------|
| 1000                  | -0.380                 | -1.390                 | 1.010             | 0.657           |
| 500                   | -0.410                 | -1.350                 | 0.940             | 0.609           |
| 250                   | -0.430                 | -1.300                 | 0.870             | 0.606           |
| 100                   | -0.460                 | -1.240                 | 0.780             | 0.567           |
| 50                    | -0.490                 | -1.200                 | 0.710             | 0.417           |

**Table S2.** Electrochemical data for  $[\text{Ce}(\text{ArOSeO})_2][\text{Na}(\text{THF})_3]$ .

| Scan rate<br>(mV/sec) | $E_{pa}$<br>[V vs. Fc] | $E_{pc}$<br>[V vs. Fc] | $\Delta E$<br>[V] | $I_{pc}/I_{pa}$ |
|-----------------------|------------------------|------------------------|-------------------|-----------------|
| 1000                  | -0.305                 | -0.515                 | 0.210             | 2.81            |
| 500                   | -0.325                 | -0.495                 | 0.170             | 2.62            |
| 250                   | -0.345                 | -0.485                 | 0.140             | 2.84            |
| 100                   | -0.355                 | -0.485                 | 0.130             | 3.02            |
| 50                    | -0.375                 | -0.485                 | 0.110             | 3.30            |
